# Supplementary material for: Efficient Day-and-Night NO2 Abatement by Polyaniline/TiO2 Nanocomposites
Source: MDPI journal article supplement (doi:10.3390/ma16031304), 2023-02-03
Supplement: s1 [file s1]

# Efficient Day-and-Night NO<sub>2</sub> Abatement by Polyaniline/TiO<sub>2</sub> Nanocomposites

Daniela Meroni <sup>1,2</sup>, Melissa G. Galloni <sup>1,2</sup>, Carolina Cionti <sup>1</sup>, Giuseppina Cerrato <sup>3</sup>, Ermelinda Falletta <sup>1,2,\*</sup> and Claudia L. Bianchi <sup>1,2</sup>

<sup>1</sup> Dipartimento di Chimica, Università degli Studi di Milano, via Camillo Golgi 19, 20133 Milano, Italy

<sup>2</sup> Consorzio Interuniversitario Nazionale per la Scienza e Tecnologia dei Materiali (INSTM), via Giusti 9, 50121 Florence, Italy

<sup>3</sup> Dipartimento di Chimica, Università degli Studi di Torino, via Pietro Giuria 7, 10125 Torino, Italy

\* Correspondence: ermelinda.falletta@unimi.it; Tel.: +39-02503114410

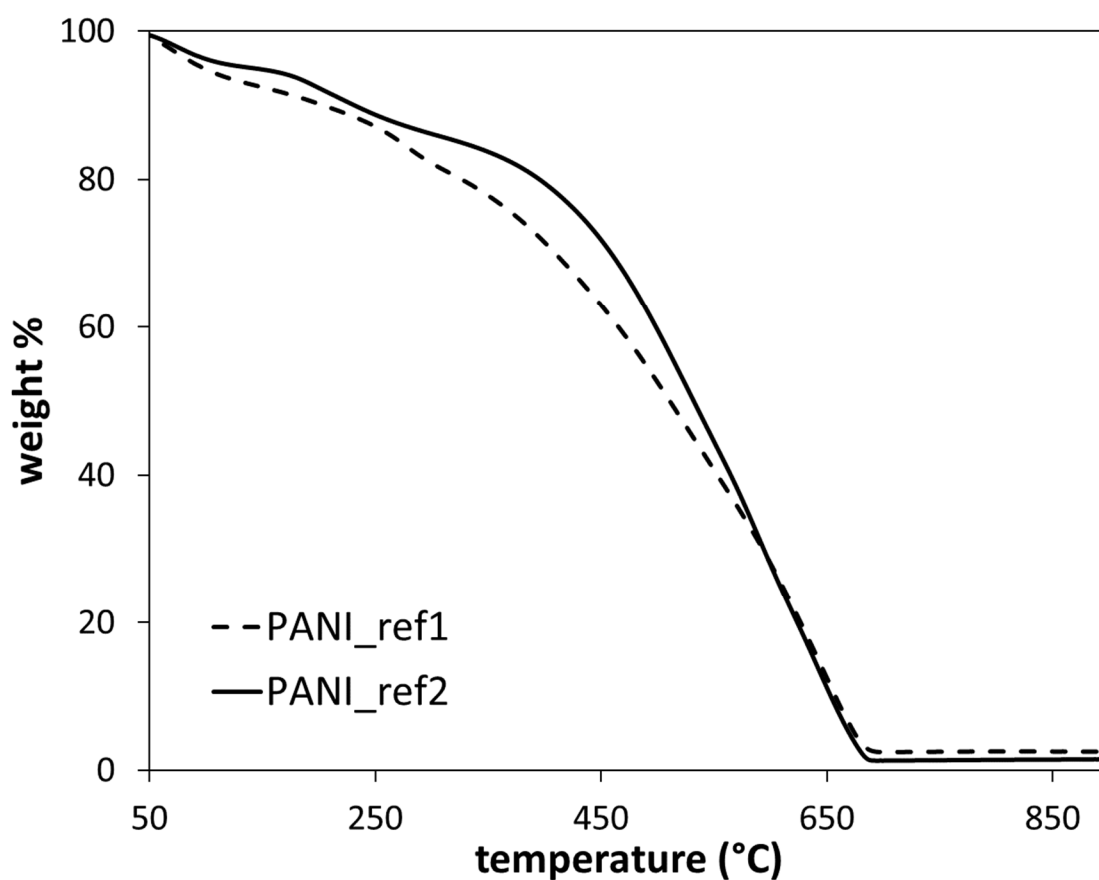

**Figure S1:** TGA curves of the pristine PANI\_ref1 and the PANI\_ref2.

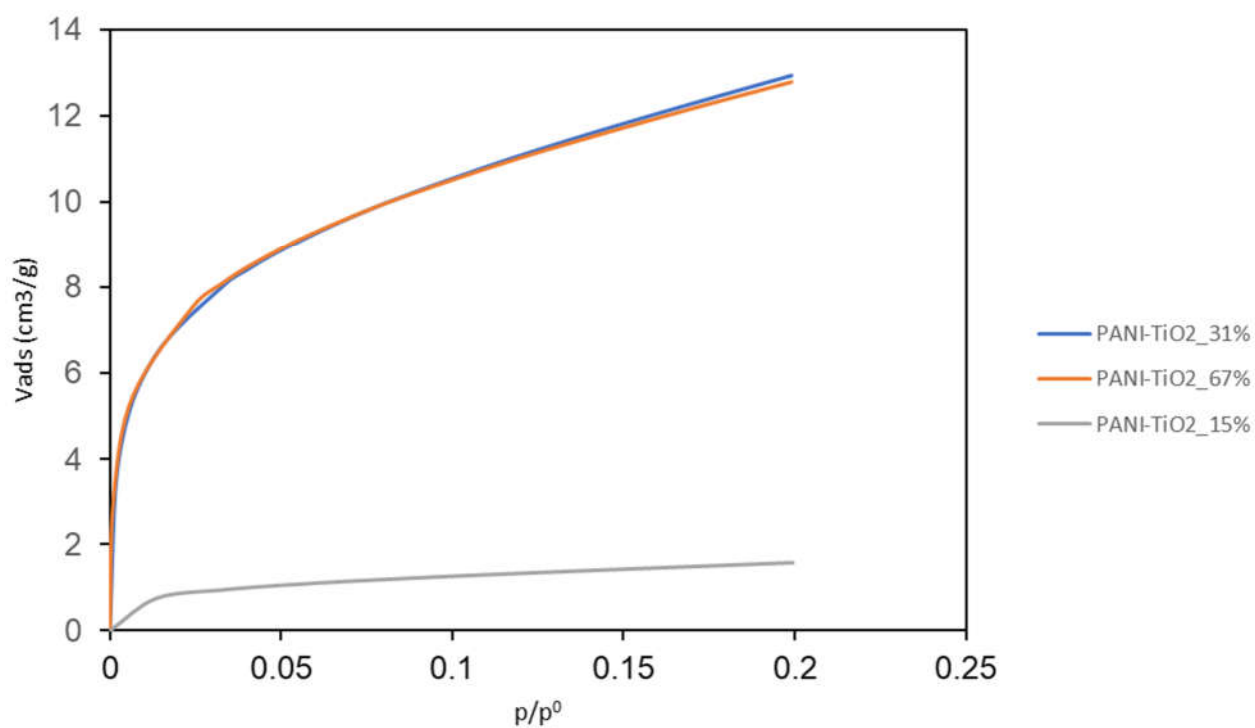

**Figure S2:** N<sub>2</sub> adsorption isotherms in  $0 < p/p^0 < 0.2$  for the samples.

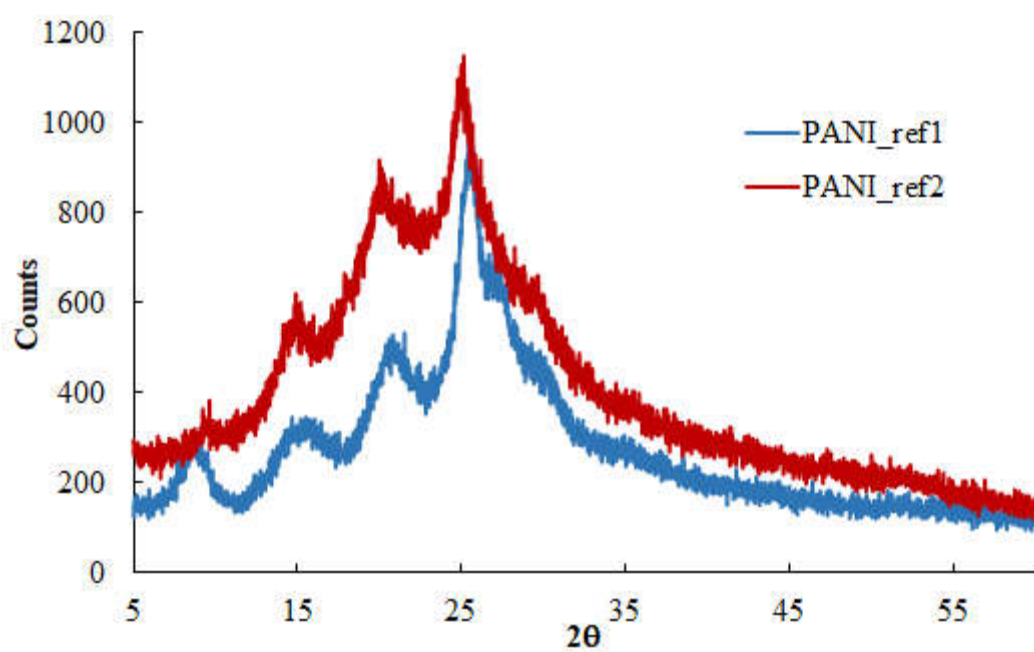

**Figure S3:** PXRD of PANI\_ref1 and PANI\_ref2.

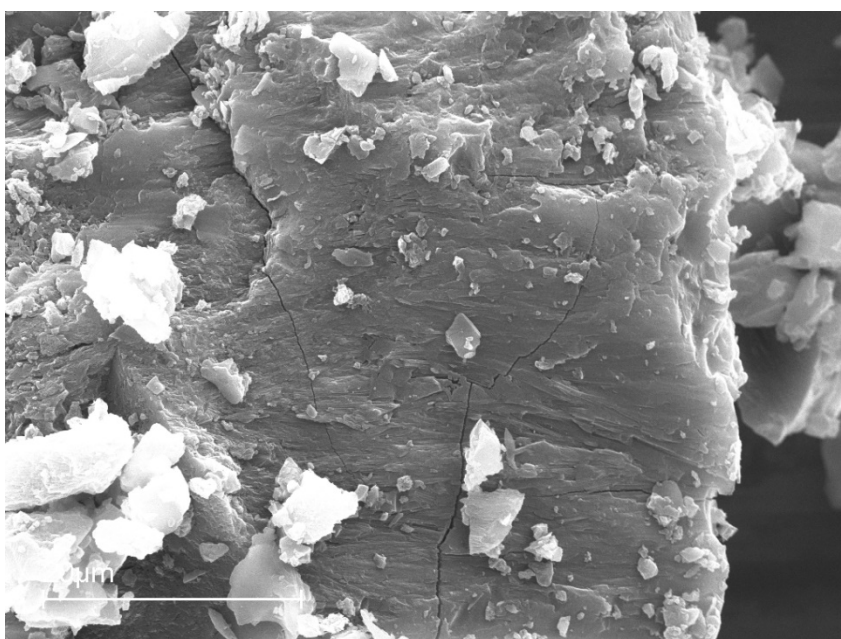

**Figure S4:** SEM of PANI\_ref2.

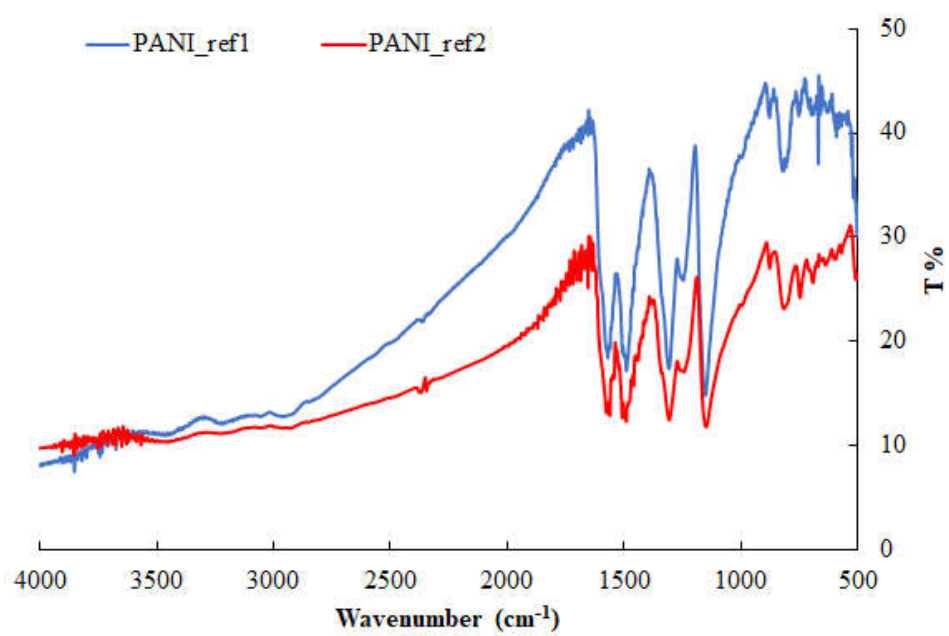

**Figure S5:** FTIR spectra of PANI\_ref1 and PANI\_ref2.

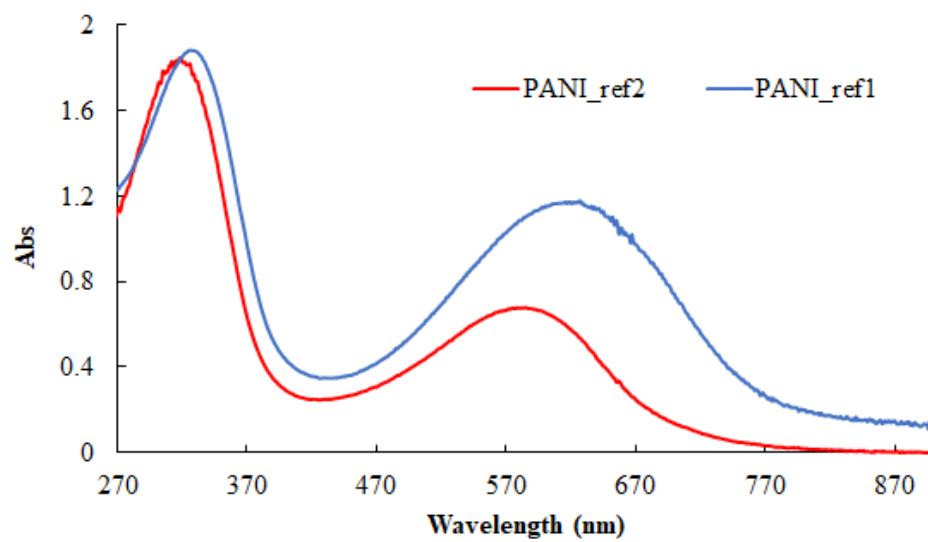

**Figure S6:** UV-vis spectra of PANI\_ref1 and PANI\_ref2.

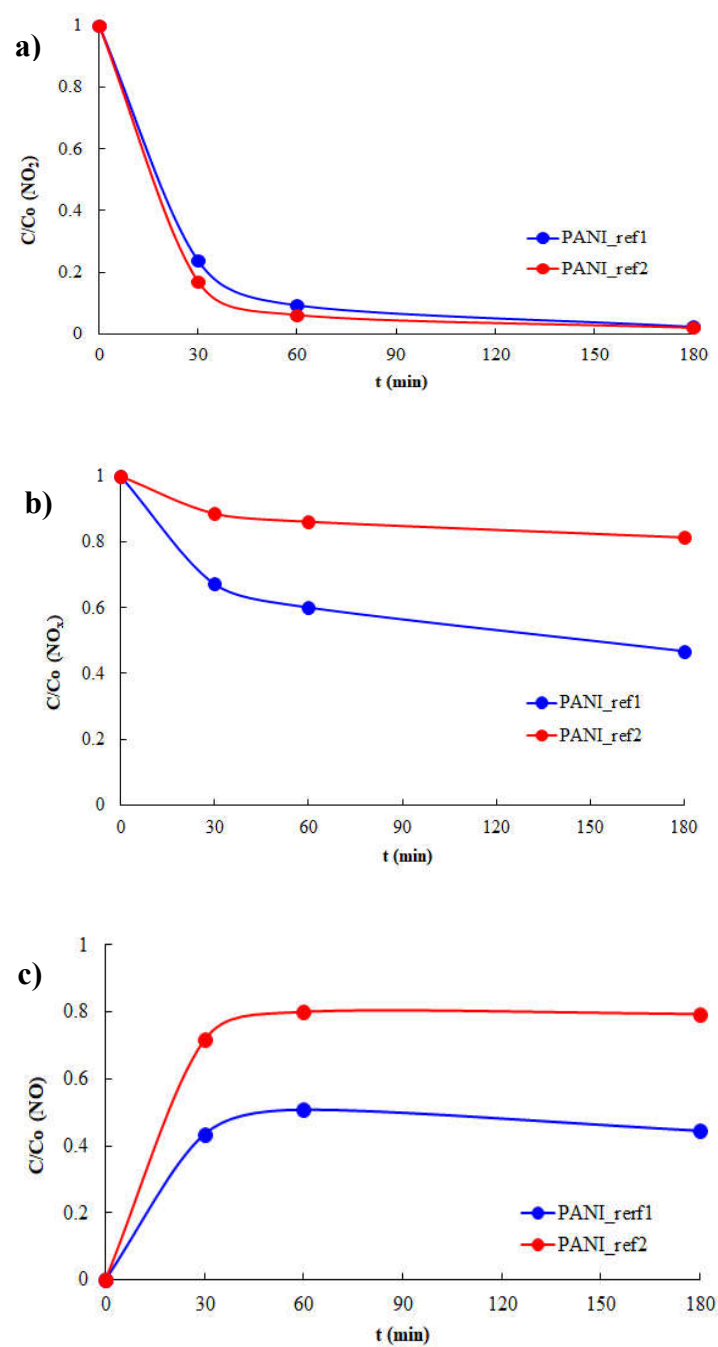

**Figure S7:** (a)  $\text{NO}_2$  and (b)  $\text{NO}_x$  removal efficiency and (c)  $\text{NO}$  production as a function of time for PANI1 and PANI2 under UVA light.

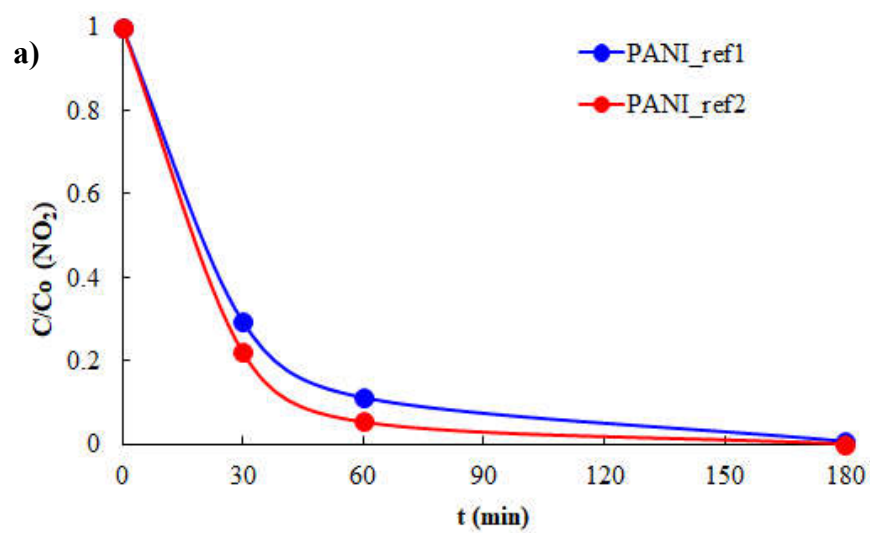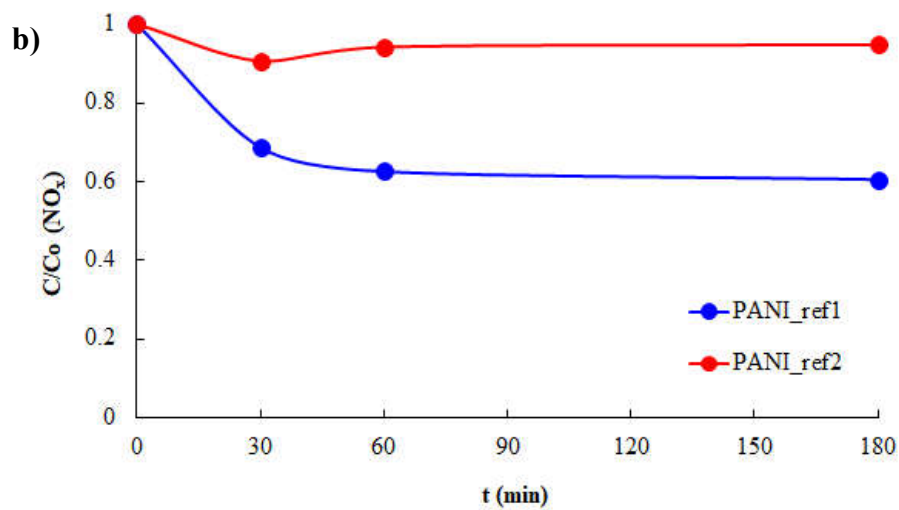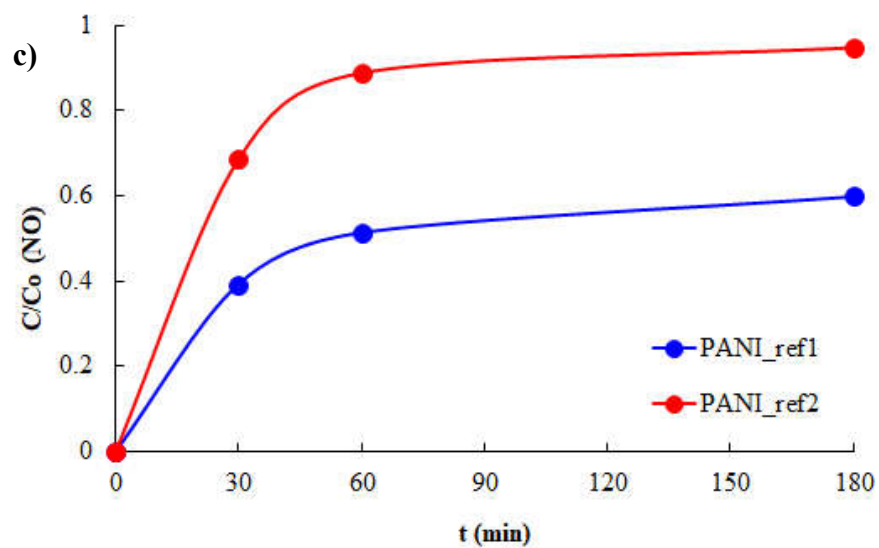

**Figure S8:** (a)  $\text{NO}_2$  and (b)  $\text{NO}_x$  removal efficiency and (c)  $\text{NO}$  production as a function of time for PANI1 and PANI2 under LED light.

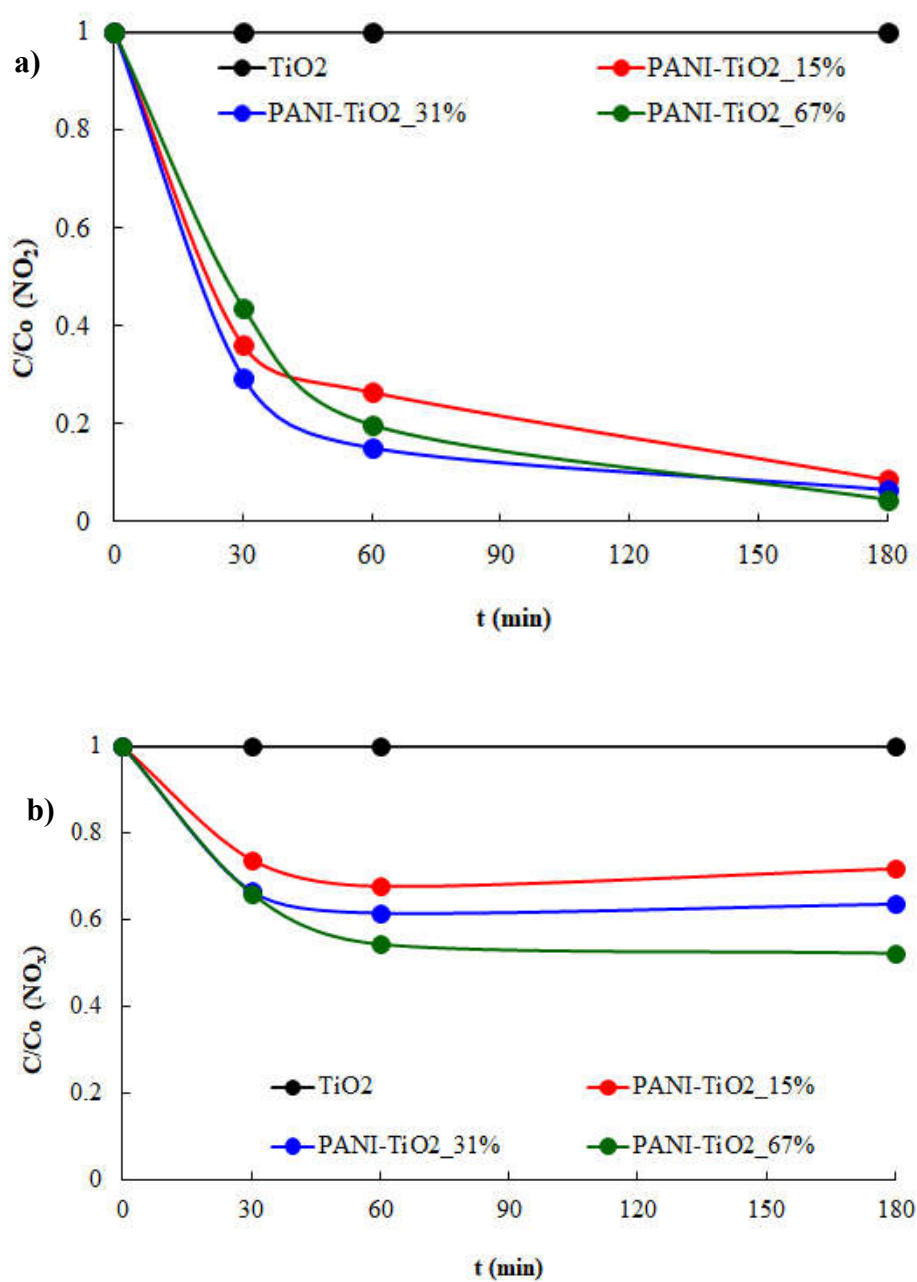

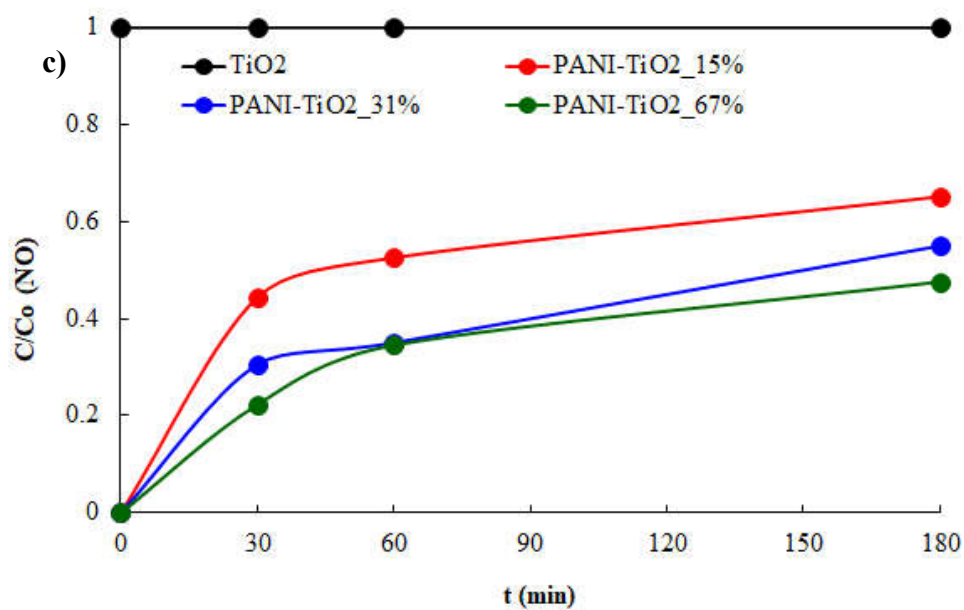

**Figure S9:** (a) NO<sub>2</sub> and (b) NO<sub>x</sub> removal efficiency and (c) NO production as a function of time for TiO<sub>2</sub> and PANI/TiO<sub>2</sub> nanocomposites in dark.

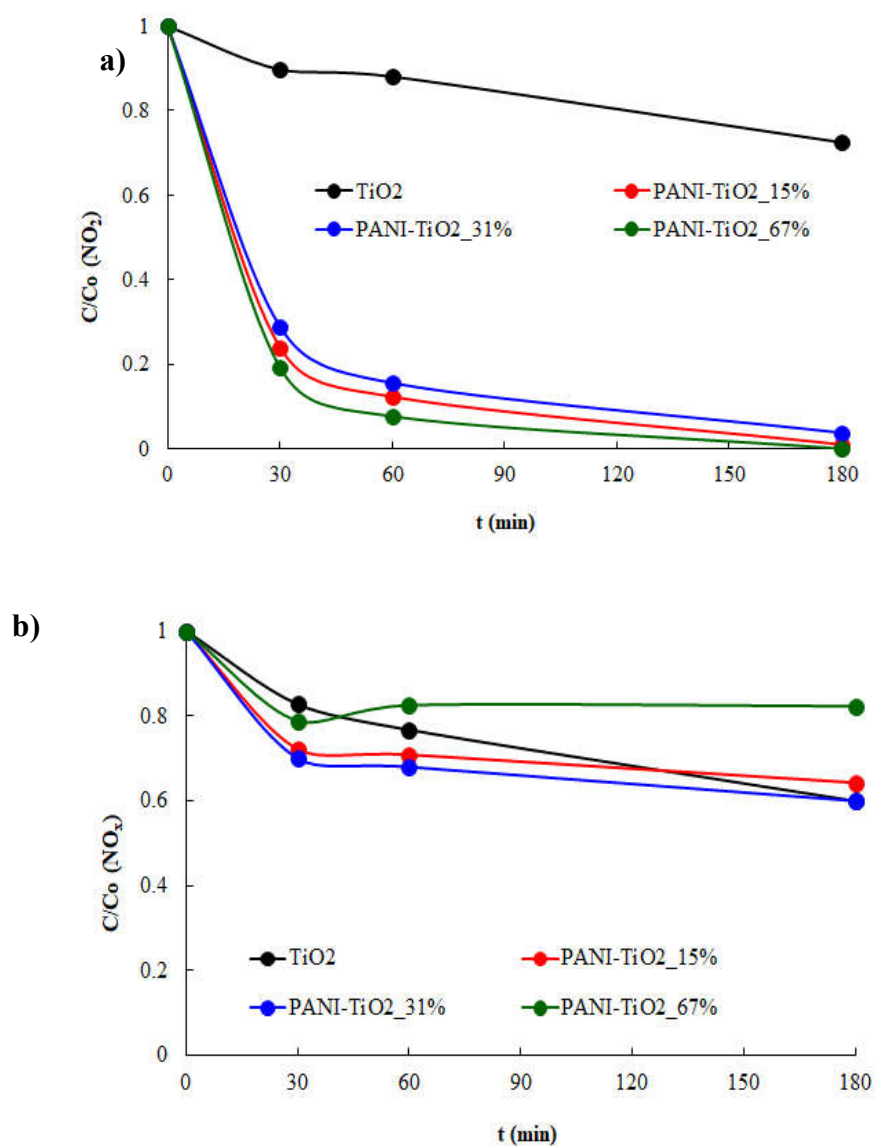



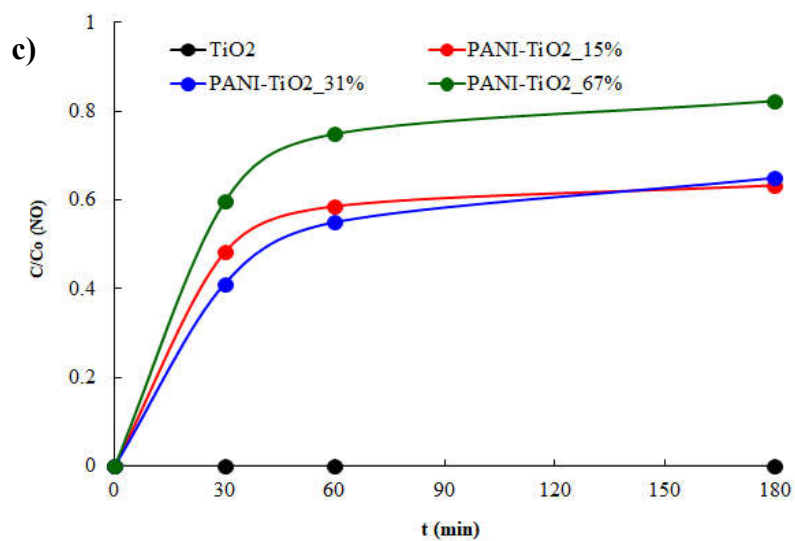

**Figure S10:** (a) NO<sub>2</sub> and (b) NO<sub>x</sub> removal efficiency and (c) NO production as a function of time for TiO<sub>2</sub> and PANI/TiO<sub>2</sub> nanocomposites under LED light.

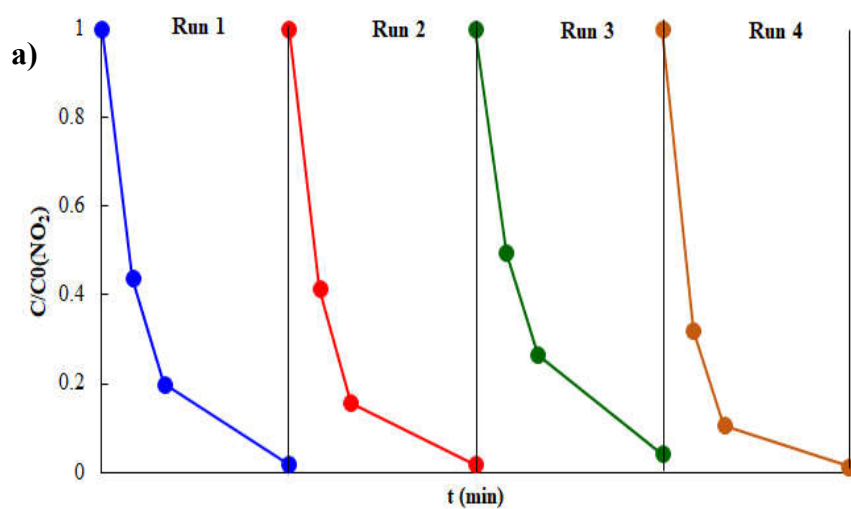

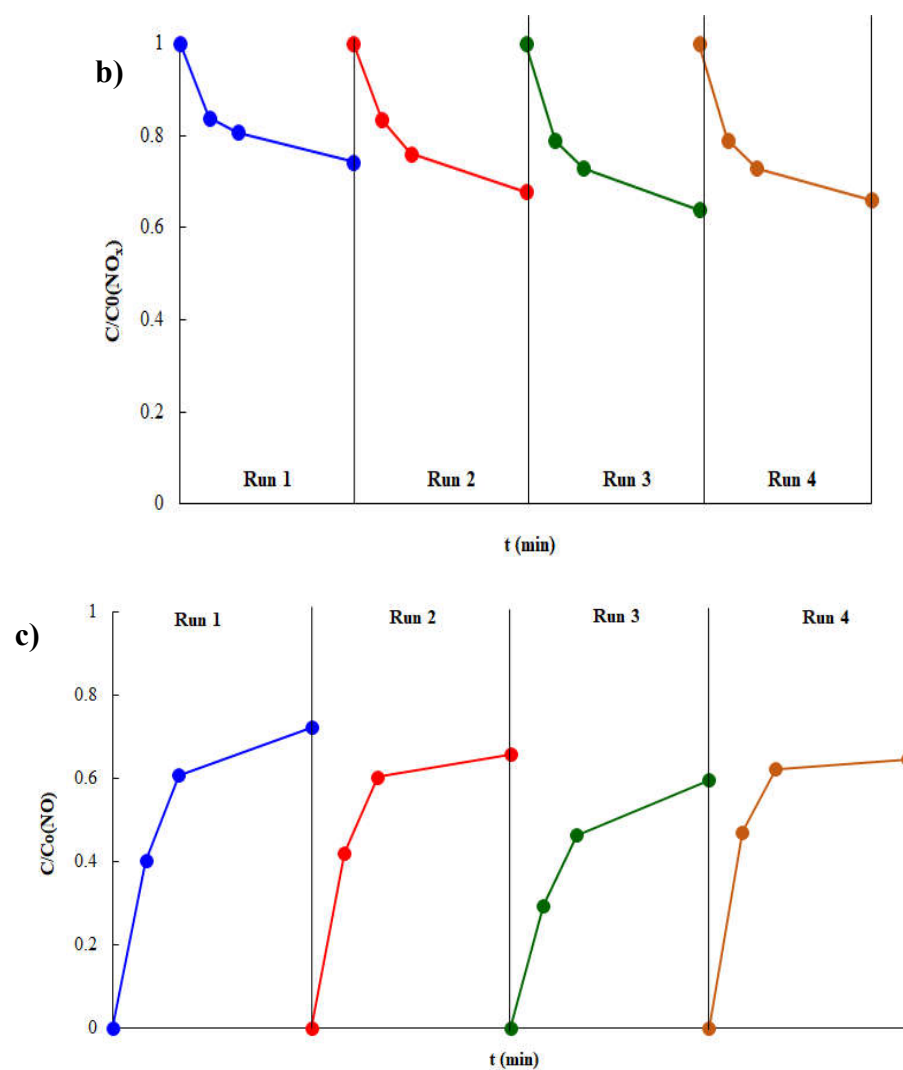

**Figure S11:** Recycle tests carried out with PANI\_ref1 under dark: (a) NO<sub>2</sub> and (b) NO<sub>x</sub> removal efficiency and (c) NO production.

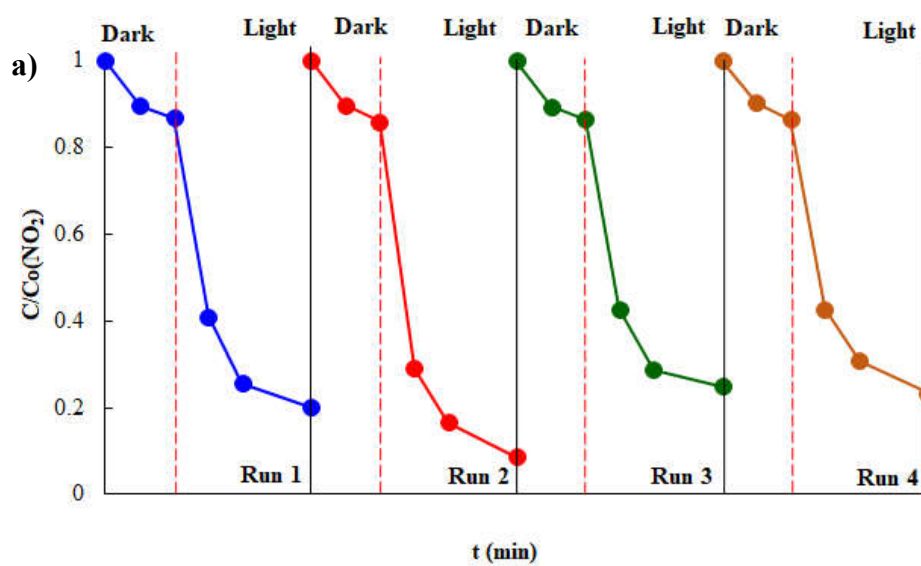

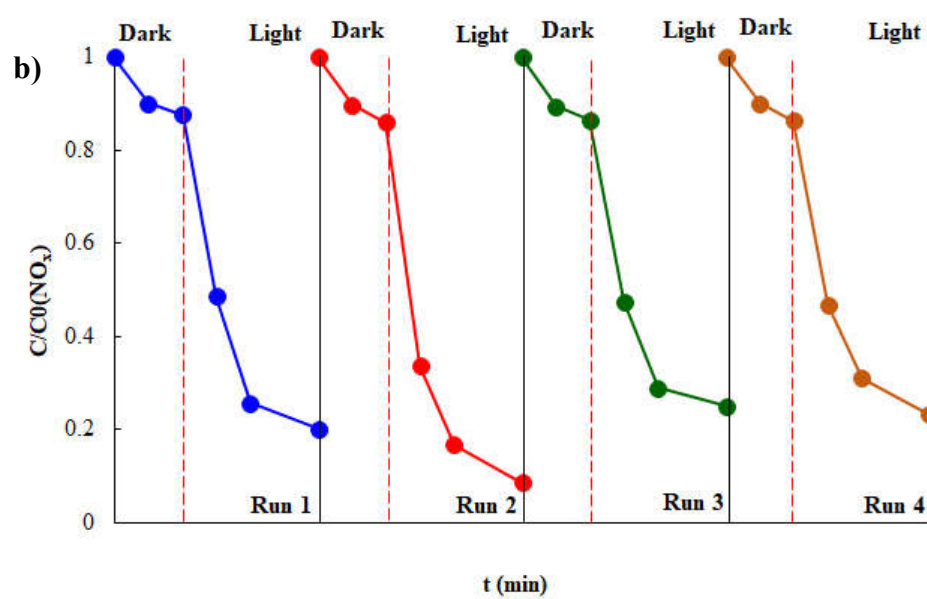

**Figure S12:** Recycle tests carried out with  $\text{TiO}_2$  under UVA irradiation: (a)  $\text{NO}_2$  and (b)  $\text{NO}_x$  removal efficiency.
